# Supplementary material for: Clinical Outcomes of Breast Cancer in Carriers of BRCA1 and BRCA2 Mutations
Source: Atypon-hosted journal article supplement (doi:10.1056/nejmoa070608), 2007-07-11
Supplement: nejm_rennert_115sa1.pdf [file nejm_rennert_115sa1.pdf]

## Supplementary Appendix

This appendix has been provided by the authors to give readers additional information about their work.

Supplement to: Rennert G, Bisland-Naggan S, Barnett-Griness O, et al. Clinical outcomes of breast cancer in carriers of *BRCA1* and *BRCA2* mutations. *N Engl J Med* 2007;357:115-23.

|                             | <b>Non<br/>BRCA<br/>carriers</b> | BRCA1         | BRCA2         |
|-----------------------------|----------------------------------|---------------|---------------|
| n                           | 1189                             | 76            | 52            |
| <b>Additional tumors</b>    |                                  |               |               |
| Ovarian cancer              | 10<br>(0.8%)                     | 5<br>(6.6%)   | 3<br>(5.8%)   |
| Second breast cancer        | 130<br>(10.9%)                   | 17<br>(22.4%) | 10<br>(19.2%) |
|                             |                                  |               |               |
| <b>Any additional tumor</b> | 278<br>(23.4%)                   | 26<br>(34.2%) | 16<br>(30.8%) |
| <b>No additional tumors</b> | 911<br>(76.6%)                   | 50<br>(65.8%) | 36<br>(69.2%) |

Only Jews of Ashkenazi+ Iraqi + Israeli-born of unknown origin
